# Supplementary material for: Network Modeling of Crohn’s Disease Incidence
Source: PLoS One. 2016 Jun 16;11(6):e0156138. doi: 10.1371/journal.pone.0156138 (PMC4911211; doi:10.1371/journal.pone.0156138)
Supplement: S5 File — (DOCX) [file pone.0156138.s005.docx]

**S5 File. Computation of the distribution of the OR.**

We first condition on the set of loci which have a prescribed RAF equal to *p*. Then, we observe that

[S32]

with [S33]

Therefore, if is distributed according to some probability density then, applying the change of variable formula, one deduces that is distributed according to the density:

[S34]

We remark from the data that actually depends very weakly upon *p*(suppl. figure 2). We thus assume that is independent of *p*. Denoting *(p)* the RAF probability distribution, we reconstruct the final density for across all loci by:

[S35]

**Suppl. figure 2.** Odds Ratios and risk allele frequencies in the general population for the disease-associated alleles reported for CD (derived from Jostins L et al. 2012).
